# Supplementary material
Source: MDPI journal article supplement (https://www.mdpi.com/2076-3417/14/5/2014)
Supplement: s1 [file s1]

**Table S1.** TPC, flavonoids and anthocyanins content and antioxidant activity determined by ABTS and DPPH methods after 5, 10 and 15 minutes of brewing.

| Type of tea           | Brewing time | Tea steeping min. | TPC   | Anthocyanin | Flavonoid       | ABTS         | DPPH         |
|-----------------------|--------------|-------------------|-------|-------------|-----------------|--------------|--------------|
|                       |              |                   | mg/ml | mg/ml       | ug quercetin/mL | ug Trolox/ml | ug Trolox/ml |
| Green tea             | 75           | 5                 | 0,188 | 0,11        | 5,30            | 2,46         | 26,11        |
| Green tea             | 75           | 10                | 0,322 | 0,00        | 4,71            | 2,50         | 26,78        |
| Green tea             | 75           | 15                | 0,367 | 0,00        | 2,21            | 2,37         | 28,23        |
| Green tea bags        | 100          | 5                 | 0,555 | 0,08        | 8,51            | 2,30         | 23,41        |
| Green tea bags        | 100          | 10                | 0,851 | 0,42        | 11,05           | 2,69         | 25,48        |
| Green tea bags        | 100          | 15                | 1,352 | 0,50        | 14,03           | 2,81         | 29,04        |
| White tea bags        | 100          | 5                 | 0,403 | 0,19        | 10,06           | 2,48         | 26,92        |
| White tea bags        | 100          | 10                | 0,537 | 0,28        | 8,07            | 2,44         | 22,33        |
| White tea bags        | 100          | 15                | 0,797 | 0,31        | 14,36           | 2,53         | 22,72        |
| Black tea bags        | 100          | 5                 | 0,994 | 1,00        | 28,18           | 2,81         | 25,60        |
| Black tea bags        | 100          | 10                | 0,528 | 0,81        | 18,78           | 2,48         | 24,29        |
| Black tea bags        | 100          | 15                | 0,851 | 1,22        | 33,92           | 2,81         | 27,81        |
| Red tea bags          | 95           | 5                 | 0,600 | 1,09        | 21,44           | 2,31         | 23,88        |
| Red tea bags          | 95           | 10                | 0,448 | 1,40        | 14,59           | 2,55         | 23,81        |
| Red tea bags          | 95           | 15                | 0,493 | 1,57        | 21,88           | 2,48         | 21,52        |
| Red tea               | 95           | 5                 | 0,116 | 0,08        | 5,01            | 2,42         | 27,64        |
| Red tea               | 95           | 10                | 0,215 | 0,13        | 11,27           | 2,41         | 28,74        |
| Red tea               | 95           | 15                | 0,224 | 0,25        | 8,51            | 2,35         | 23,79        |
| Yerba mate            | 70           | 5                 | 0,027 | 1,06        | 22,87           | 2,43         | 24,07        |
| Yerba mate            | 70           | 10                | 0,331 | 1,09        | 13,15           | 2,41         | 23,24        |
| Yerba mate            | 70           | 15                | 0,645 | 1,22        | 23,87           | 2,38         | 23,83        |
| Raspberry tea bags    | 70           | 5                 | 0,305 | 4,63        | 11,05           | 2,22         | 22,96        |
| Raspberry tea bags    | 70           | 10                | 0,394 | 5,65        | 10,28           | 2,29         | 24,85        |
| Raspberry tea bags    | 70           | 15                | 0,537 | 5,73        | 121,44          | 2,37         | 23,24        |
| Clitoria tea          | 100          | 5                 | 1,021 | 0,10        | 50,09           | 2,99         | 30,51        |
| Clitoria tea          | 100          | 10                | 1,003 | 0,19        | 161,10          | 3,04         | 31,08        |
| Clitoria tea          | 100          | 15                | 1,030 | 0,17        | 123,09          | 3,04         | 30,86        |
| Lychee plum white tea | 85           | 5                 | 1,191 | 0,08        | 4,86            | 2,81         | 30,72        |
| Lychee plum white tea | 85           | 10                | 1,352 | 0,08        | 92,38           | 2,57         | 30,26        |
| Lychee plum white tea | 85           | 15                | 1,782 | 0,08        | 51,27           | 3,01         | 30,33        |
| Hibiscus flower tea   | 100          | 5                 | 1,075 | 0,08        | 87,85           | 2,59         | 32,22        |
| Hibiscus flower tea   | 100          | 10                | 1,129 | 0,06        | 22,54           | 2,85         | 31,16        |
| Hibiscus flower tea   | 100          | 15                | 1,129 | 0,03        | 24,56           | 2,91         | 31,37        |
